# Supplementary material for: Physicochemical Characterization and Antioxidant Activity of Humic Acids Isolated from Peat of Various Origins
Source: PubMed Central journal article supplement (PMC6017172; doi:10.3390/molecules23040753), 2018-03-24

## Supplementary Material

# Physicochemical Characterization and Antioxidant Activity of Humic Acids Isolated from Peat of Various Origins

Maria V. Zykova <sup>1,†</sup>, Igor A. Schepetkin <sup>2,†</sup>, Michael V. Belousov <sup>1</sup>, Sergey V. Krivoshechekov <sup>1,3</sup>, Lyudmila A. Logvinova <sup>1</sup>, Kristina A. Bratishko <sup>1</sup>, Mekhman S. Yusubov <sup>1,3</sup>, Sergey V. Romanenko <sup>1,3</sup> and Mark T. Quinn <sup>2,\*</sup>

<sup>1</sup> Siberian State Medical University, Tomsk, 634050, Russia

<sup>2</sup> Department of Microbiology and Immunology, Montana State University, Bozeman, MT 59717, USA

<sup>3</sup> Tomsk Polytechnic University, Tomsk, 634050, Russia

<sup>†</sup> These authors contributed equally to this work.

\* Correspondence: mquinn@montana.edu; Tel.: +1-406-994-4707; Fax: 1-406-994-4303

**Supplementary Figure S1.** Representative IR spectra of HAp-7.

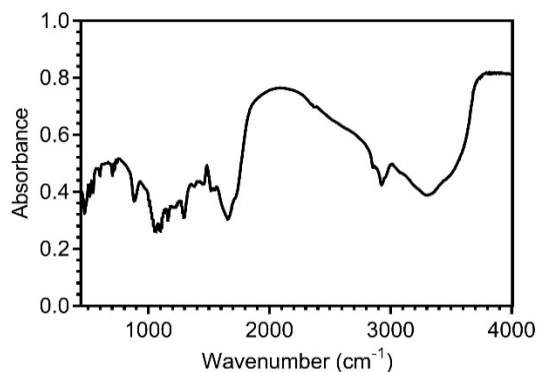

**Supplementary Figure S2.** Representative EPR spectra of HAp-7.

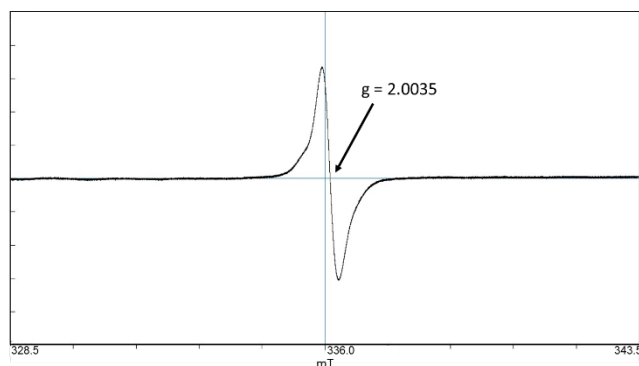

Supplement: molecules-23-00753-s001.pdf [file molecules-23-00753-s001.pdf]
